1 **Deep-sea mussels from a hybrid zone on the Mid-Atlantic Ridge host**  
2 **genetically indistinguishable symbionts**  
3

4 Merle Ücker<sup>1,2</sup>, Rebecca Ansorge<sup>1,3</sup>, Yui Sato<sup>1</sup>, Lizbeth Sayavedra<sup>1,3</sup>, Corinna Breusing<sup>4</sup>, Nicole  
5 Dubilier<sup>1,2,\*</sup>

6 <sup>1</sup>Max Planck Institute for Marine Microbiology, Bremen, Germany

7 <sup>2</sup>MARUM – Center for Marine Environmental Sciences of the University of Bremen, Bremen,  
8 Germany

9 <sup>3</sup>Quadram Institute Bioscience, Norwich, Norfolk, United Kingdom

10 <sup>4</sup>University of Rhode Island, Graduate School of Oceanography, Narragansett, RI, United States  
11 of America

12 \*Corresponding author  
13

14 **Abstract**

15 The composition and diversity of animal microbiomes is shaped by a variety of factors, many of  
16 them interacting, such as host traits, the environment, and biogeography. Hybrid zones, in which  
17 the ranges of two host species meet and hybrids are found, provide natural experiments for  
18 determining the drivers of microbiome communities, but have not been well studied in marine  
19 environments. Here, we analysed the composition of the symbiont community in two deep-sea,  
20 *Bathymodiolus* mussel species along their known distribution range at hydrothermal vents on the  
21 Mid-Atlantic Ridge, with a focus on the hybrid zone where they interbreed. In-depth  
22 metagenomic analyses of the sulphur-oxidising symbionts of 30 mussels from the hybrid zone, at  
23 a resolution of single nucleotide polymorphism analyses of ~2500 orthologous genes, revealed  
24 that parental and hybrid mussels have genetically indistinguishable symbionts. While host  
25 genetics does not appear to affect symbiont composition in these mussels, geographic location of  
26 the mussels on the Mid-Atlantic Ridge explained 45 % of symbiont genetic variability based on  
27 redundancy analyses. We hypothesize that geographic structuring of the free-living symbiont  
28 population plays a major role in driving the composition of the microbiome in these deep-sea  
29 mussels.

## 30 **Introduction**

31 The community composition of an animal's microbiome is the product of multiple interacting  
32 factors that include the environment, geography and host genetics (Benson et al., 2010;  
33 Davenport, 2016; Rothschild et al., 2018; Spor et al., 2011; Yatsunenko et al., 2012). To which  
34 extent host genetics affect microbiome composition is currently a topic of intense debate, in part  
35 as high-throughput sequencing is revealing the genetic makeup of host and symbiont populations  
36 in ever higher resolution (Di Bella et al., 2013; Ellegren, 2014; Luikart et al., 2003). Animal  
37 hybrids are useful for assessing the effects of host genotype on microbiomes (Lim &  
38 Bordenstein, 2020). Studies of lab-reared animal hybrids, such as wasps (Brucker & Bordenstein,  
39 2013), fish (Li et al., 2018; Rennison et al., 2019; Sevellec et al., 2019) and mice (Korach-  
40 Rechtman et al., 2019; Wang et al., 2015) found that these hosts had different gut microbiota  
41 than their parental species, based on sequencing of the microbial 16S rRNA gene. These altered  
42 gut microbiomes of hybrids affected the fitness of some hosts, suggesting that microbiomes play  
43 an important role in determining species barriers (Brucker & Bordenstein, 2013). Studies on lab-  
44 reared hosts cannot, however, fully reflect the environmental conditions animals experience in  
45 their natural habitat. Hybrid zones, in which parental species interbreed and produce hybrid  
46 offspring, are excellent natural experiments for teasing apart the impact of host genotype,  
47 environment and geographic distance on microbiome composition. Yet surprisingly few studies  
48 have investigated the microbiota of hybrids from the wild, and these have yielded mixed results.  
49 For example, in a hybrid zone of the European house mouse, the gut microbiota of hybrids  
50 differed from that of their parental species (Wang et al., 2015). In contrast, in African baboons  
51 there were no significant differences between hybrids and their parental species, and gut  
52 community composition was best explained by the environment (Grieneisen et al., 2019). To  
53 date, such studies, whether on lab-reared animals or those from the wild, have been based on the  
54 sequencing of only a few microbial genes, with the vast majority of analyses based on the 16S  
55 rRNA gene, or only a variable region of this gene. These studies were therefore limited to  
56 determining microbial community composition at the genus level or higher, and could not  
57 distinguish closely related species or strains.

58 Almost nothing is known about the microbial communities of hosts from marine hybrid zones,  
59 despite the pervasiveness of such zones in many regions of the oceans. Hydrothermal vents on

60 the Mid-Atlantic Ridge (MAR), an underwater mountain range extending from the Arctic to the  
61 Southern Ocean, provide an ideal setting for investigating the microbiomes of hosts in natural  
62 hybrid zones. Many of the vents on the MAR are dominated by *Bathymodiolus* mussels that live  
63 in a nutritional symbiosis with chemosynthetic bacteria. Two mussel species colonise the  
64 northern MAR, *B. azoricus*, which is found at vents from 38°N to 36°N, and *B. puteoserpentis*,  
65 which inhabits vents further south from 23°N to 13°N. A hybrid zone between these two host  
66 species occurs at the Broken Spur vent field at 29°N on the MAR, where *B. puteoserpentis* co-  
67 occurs with hybrids between *B. azoricus* and *B. puteoserpentis* (Breusing et al., 2017; O'Mullan  
68 et al., 2001; Won, Hallam, O'Mullan, & Vrijenhoek, 2003).

69 The symbionts of bathymodiolin mussels are transmitted horizontally from the environment to  
70 juvenile mussels, yet each mussel species harbours a highly specific symbiont community  
71 (Dubilier et al., 2008; Van Dover et al., 2002; Won, Hallam, O'Mullan, Pan, et al., 2003). This  
72 specificity suggests that the genetics of bathymodiolin mussels plays an important role in  
73 determining symbiont composition. In this study, we took advantage of the natural hybrid zone  
74 of *Bathymodiolus* mussels at the Broken Spur vent field to investigate how host genotype,  
75 geographic distance, and the vent environment affect the composition of their sulphur-oxidising  
76 (SOX) symbionts. The recent discovery of a high diversity of SOX symbiont strains in  
77 *Bathymodiolus* from the MAR, with as many as 16 strains co-occurring in single *Bathymodiolus*  
78 mussels (Ansorge et al., 2019; Ikuta et al., 2016; Picazo et al., 2019), made it critical to resolve  
79 genetic differences at the strain level of the SOX symbiont community (strain is defined here as  
80 suggested by Van Rossum et al., 2020, as subordinate to subspecies, in our study >99 % average  
81 nucleotide identity). We achieved this resolution through multilocus phylogeny, genome-wide  
82 gene profiling, and single nucleotide polymorphism (SNP)-based population differentiation  
83 analyses of 30 *Bathymodiolus* hybrid and parental individuals collected in 1997 and 2001 at the  
84 Broken Spur vent field.

## 85 **Materials & Methods**

86 A detailed description of samples and methods is available in the Supplementary Information  
87 and an overview of the analyses of SOX symbionts used in this study is provided in  
88 Supplementary Table S 4. Data files and scripts used for the analyses can be found in the GitHub  
89 repository ([https://github.com/muecker/Symbionts\\_in\\_a\\_mussel\\_hybrid\\_zone](https://github.com/muecker/Symbionts_in_a_mussel_hybrid_zone)).

90 Broken Spur parental mussels (13 *B. puteoserpentis*) and hybrids (17 F2 – F4 generation hybrids,  
91 see supplement) were identified as described previously (Breusing et al., 2016, 2017) (no  
92 parental *B. azoricus* were found at Broken Spur). Briefly, mussels were genotyped based on 18  
93 species-diagnostic markers and identified as parental or hybrid mussels using bioinformatic  
94 analyses of population structure, admixture and introgression (Supplementary Table S 2). After  
95 DNA extraction and sequencing, we assembled metagenomes per mussel individual from  
96 Illumina short-read sequences. Metagenome-assembled genomes (MAGs) of the SOX symbionts  
97 from each mussel individual were binned (for statistics of symbionts MAGs, see Supplementary  
98 Table S 3), representing the consensus of all SOX symbiont strains in each host individual.

99 To evaluate genetic differences between symbionts from the northern MAR at the level of  
100 bacterial subspecies (sensu Van Rossum et al., 2020, here between 97 % and 99 % average  
101 nucleotide identity), we used 171 single-copy, gammaproteobacterial marker genes for  
102 phylogenomic analysis of the SOX symbiont MAGs and their closest symbiotic, e.g. symbionts  
103 of *B. azoricus* from vents north of Broken Spur and *B. puteoserpentis* mussels from vents south  
104 of Broken Spur, and free-living relatives (see Supplementary Table S 5). To understand which  
105 factors affect symbiont composition on the strain level at the northern MAR, we assessed the  
106 influence of geographic distance, host species, vent type (basaltic versus ultramafic rock) and  
107 depth on SOX symbiont allele frequencies using redundancy analysis (RDA). We analysed  
108 Broken Spur symbiont MAGs at the genome-wide level by comparing their average nucleotide  
109 identities (ANI) to resolve differences on the subspecies level. To resolve strain-level differences  
110 between SOX symbionts from Broken Spur, we analysed pairwise  $F_{ST}$  values based on SNPs in  
111 2496 orthologous genes from Broken Spur SOX symbiont MAGs. To identify genes that differed  
112 between hybrid and parental symbiont populations, we analysed the presence/absence and  
113 differential abundance of these orthologues, and further investigated pairwise  $F_{ST}$  values of all  
114 2496 orthologous genes.

## 115 **Results & Discussion**

116 Phylogenomic analysis of 171 single-copy genes revealed the presence of two SOX symbiont  
117 subspecies, one specific to *B. azoricus* from the more northern vents Menez Gwen, Lucky Strike  
118 and Rainbow, and one specific to *B. puteoserpentis* from the vents further south, Logatchev and  
119 Semenov (Figure 1 A, C).



**Figure 1 | Phylogenetic relationships of *Bathymodiolus* SOX symbionts and their mussel hosts.** (A) Overview tree based on 171 single-copy marker genes. The *Bathymodiolus* SOX symbionts from the northern Mid-Atlantic Ridge (blue, yellow and pink) form a clade within the gammaproteobacterial SUP05 clade. *Thiomicrospira* spp. and *Ca. T. singularis* PS1 were used as outgroups. MAG accessions are listed in supplementary table S 5. (B) Host phylogeny based on published mitochondrial cytochrome oxidase subunit I (COI) sequences. “*B.*” *childressi* was used as an outgroup. Sequence accessions are listed in the supplement (“1.3 Reconstruction of *Bathymodiolus* phylogeny”) (C) Phylogeny of *Bathymodiolus* SOX symbionts from vents on the northern Mid-Atlantic Ridge, based on 171 single-copy marker genes. Colours correspond to vent sites shown in the map. Hybrid individuals from Broken Spur are marked with a grey star. *Bathymodiolus* SOX symbionts from the vent sites Clueless (5°S) and Lilliput (9°S) were used as outgroups.

*B.*: *Bathymodiolus*, MAR: Mid-Atlantic Ridge, GoM: Gulf of Mexico, EPR: East Pacific Rise, J: Japan, NP: North Pacific.

121 This substantiates previous analyses based on sequencing of the 16S rRNA gene and internal  
122 transcribed spacer that these two *Bathymodiolus* species harbour different SOX symbiont  
123 subspecies of the same bacterial species (DeChaine et al., 2006; Duperron et al., 2006; Won,  
124 Hallam, O’Mullan, Pan, et al., 2003). Our phylogenomic analyses revealed that all  
125 *Bathymodiolus* individuals from Broken Spur harboured a third SOX symbiont subspecies  
126 (Figure 1 A, C). This new subspecies is most closely related to the *B. puteoserpentis* SOX  
127 symbiont subspecies from mussels collected south of Broken Spur. These two symbiont  
128 subspecies form a sister group to the SOX symbiont subspecies of *B. azoricus* collected at vents  
129 north of Broken Spur.

130 To evaluate if the SOX symbionts of Broken Spur parental and hybrid *Bathymodiolus* differed,  
131 we compared their average nucleotide identities (ANI) and estimated genomic differentiation  
132 ( $F_{ST}$ ) based on ~2500 orthologous genes. We found no significant differences, and also did not  
133 see an effect of the year in which the mussels were collected (Figure 2). Our analyses of SNPs  
134 per individual gene revealed that not even one of the ~2500 orthologous genes had significantly  
135 differing  $F_{ST}$  values (Mann-Whitney U test of  $F_{ST}$  per gene between versus within symbionts of  
136 hybrids and parental mussels). Similarly, there was also no significant difference between  
137 hybrids and parental individuals in the abundance of symbiont genes (based on a general linear  
138 model and Kruskal-Wallis test in ALDEx2 using Benjamini-Hochberg corrected p-value <  
139 0.05) or their presence/absence. These results indicate that the composition and gene repertoire

140 of SOX symbionts in Broken Spur mussels is highly similar or identical in hybrids and parental  
141 *B. puteoserpentis*. A study of SOX symbionts in hybrids of *B. thermophilus* and *B. antarcticus* at  
142 23°S in the eastern Pacific also found that these could not be distinguished from parental  
143 mussels, based on PCR analyses of seven bacterial marker genes in five parental and three hybrid  
144 individuals (Ho et al., 2017).

145

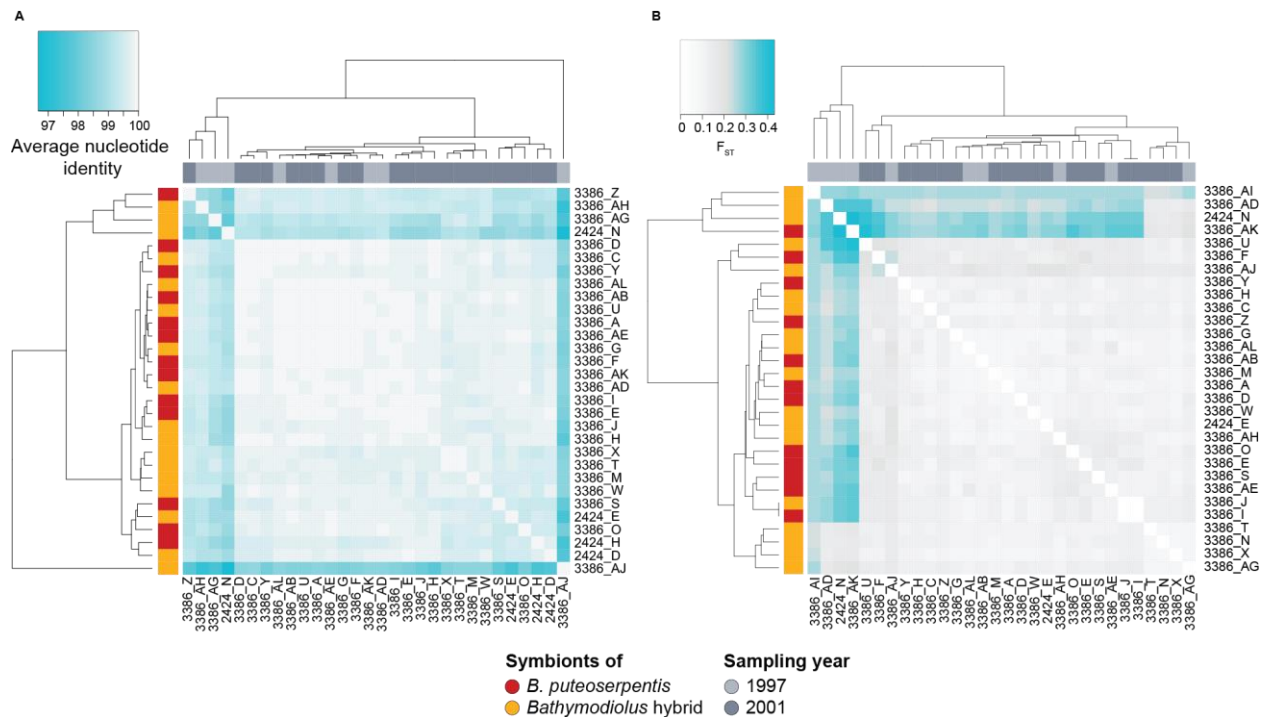

**Figure 2 | Genome-wide differentiation of *Bathymodiolus* SOX symbionts at Broken Spur based on (A) pairwise average nucleotide identity, and (B) pairwise average  $F_{ST}$  based on 2496 orthologous genes.** Colour bars represent host genotypes (red: *B. puteoserpentis*, yellow: hybrids) and the sampling year (light grey: 1997, dark grey: 2001). Turquoise indicates a higher differentiation or more dissimilar genomes. Neither clustering based on ANI (A), nor  $F_{ST}$  (B) correlates with host genotype (A:  $r = 0.054$ ,  $p = 0.222$ , B:  $r = 0.006$ ,  $p = 0.435$ ) or sampling year (A:  $r = -0.191$ ,  $p = 0.949$ , B:  $r = 0.105$ ,  $p = 0.150$ ).

146

147 Our results raise the question at what level of genetic divergence between two host species  
148 differences in their symbiont communities evolve. *B. brooksi* and *B. heckerae*, which regularly  
149 co-occur in the Gulf of Mexico, harbour different symbiont species that are only distantly related  
150 to each other (Figure 1 A, B). These two mussel species have an estimated splitting time of  
151 15.4 Mya (Faure et al., 2015), and are not known to hybridise. More closely related hosts, such

152 as *B. thermophilus* and *B. antarcticus* (estimated splitting time of 2.5 – 5.3 Mya (Won, Young,  
153 Lutz, & Vrijenhoek, 2003)), and *B. azoricus* and *B. puteoserpentis* (estimated splitting time of  
154 8.4 Mya (Faure et al., 2015)), produce fertile hybrids (Johnson et al., 2013; O’Mullan et al.,  
155 2001), and have genetically indistinguishable symbionts in zones where they hybridise. This  
156 suggests that specificity at the symbiont species level in these horizontally transmitted symbioses  
157 evolves only after extended divergence times of tens of millions of years, during which these  
158 hosts become genetically dissimilar enough to evolve specific symbiont selection mechanisms.

159 While *Bathymodiolus* mussels on the northern MAR host the same SOX symbiont species, our  
160 phylogenomic analyses revealed clear genetic differentiation in three SOX symbiont subspecies:  
161 *B. azoricus*, *B. puteoserpentis* and Broken Spur subspecies (Figure 1). To better understand the  
162 factors that drive this symbiont differentiation, we tested which influence host species,  
163 geographic distance, vent type (basaltic versus ultramafic rock) and depth have on symbiont  
164 allele frequencies. All variables were highly collinear. For example, the water depth of the vents  
165 studied here increases with geographic distance, from 800 m at 37.8°N, to 3050 m at 14.7°N  
166 (only the southernmost vent at 13.5°N and 2320 m depth interrupted this pattern). Of the 49 % of  
167 the SOX symbiont differentiation that could be explained, host species, depth and vent type  
168 explained 23 %, 20 % and 14 % respectively. Geographic distance had by far the strongest effect  
169 with 45 % of variation explained ( $p$ -value < 0.001, Figure 3).

170 There are at least two explanations for why geographic distance has such a large effect on the  
171 SOX symbiont composition of *Bathymodiolus* mussels from the northern MAR. The first is that  
172 genetic differences between the hosts increase with geographic distance. However, population  
173 genetic analyses of *B. azoricus* and *B. puteoserpentis* from the same vents as in our study  
174 indicated no genetic structuring within each of these host species (Breusing et al., 2016). This  
175 indicates that host genetics do not play a major role in structuring the SOX symbiont  
176 composition. The second, more likely explanation is that the free-living pool of SOX symbionts  
177 is geographically structured. *Bathymodiolus* mussels acquire their symbionts horizontally from  
178 the environment, presumably when the larvae settle on the seafloor (Won, Hallam, O’Mullan,  
179 Pan, et al., 2003), and must therefore take up the free-living symbionts present in the surrounding  
180 water. At Broken Spur, hybrids and *B. puteoserpentis* host genetically indistinguishable  
181 symbionts, and these differ from the symbionts of *B. azoricus* and *B. puteoserpentis* from vent



182 sites to the north and south of Broken Spur. This indicates that in these two closely related host  
183 species, geographic location but not host genetics drives the composition of their SOX symbiont  
184 communities.

185

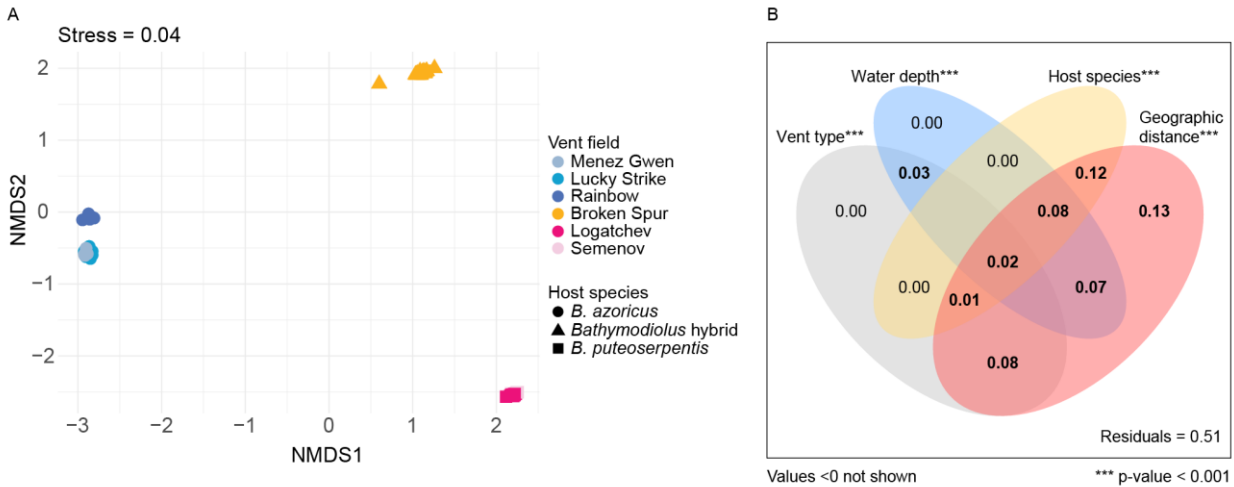

**Figure 3 | Differentiation of *Bathymodiolus* SOX symbionts at the northern Mid-Atlantic Ridge and the influence of geographic distance, host species and environmental parameters (vent type and water depth).** (A) NMDS plot of SOX symbiont allele frequencies show clear separation of the three symbiont subspecies at the northern MAR: *B. azoricus*, *B. puteoserpentis* and Broken Spur symbiont subspecies. Symbionts from Broken Spur cluster together regardless of the species affiliation of their host (hybrid versus *B. puteoserpentis*). Colours correspond to vent fields, shapes to host species. (B) Variation partitioning of explanatory variables used in the RDA (Supplementary Figure S 3). The variables vent type, water depth, host species and geographic distance explain 49 % of the total variation, with 45 % of the variation explained by geographic distance. P-values are based on permutation tests with 1000 repetitions.

186

187 Understanding the biogeography of the free-living stages of microbial symbionts and other as yet  
188 uncultured microorganisms is currently one of the biggest challenges in microbial ecology.

189 While there is evidence that 'everything is everywhere, but the environment selects' (Baas  
190 Becking, 1934; Wit & Bouvier, 2006), there is also increasing data showing that dispersal  
191 limitation shapes the biogeography of marine microorganisms (Dick, 2019; Martiny et al., 2006).

192 Almost nothing is known about the biogeography of uncultivable marine microorganisms at the  
193 subspecies or strain level, as most species are rarely abundant enough to allow phylogenetic  
194 analyses at such high resolution. Advances in high-throughput short-read, and particularly long-

195 read sequencing, coupled with bioinformatic methods for revealing genetic structuring of  
196 microbial populations, are now providing us with the tools for resolving the intraspecific  
197 diversity of environmental microorganisms. Our study highlights the importance of gaining a  
198 better understanding of the free-living community of microbial symbionts to disentangle the  
199 genetic, environmental and geographic factors that contribute to the ecological and evolutionary  
200 success of animal–microbe associations in which the symbionts are acquired from the  
201 environment.

## 202 **Data availability**

203 Sequence data (metagenomes and symbiont MAGs) are available in the European Nucleotide  
204 Archive (ENA) at EMBL-EBI under project accession number PRJEB36976  
205 (<https://www.ebi.ac.uk/ena/data/view/PRJEB36976>). The data, together with their metadata,  
206 were deposited using the data brokerage service of the German Federation for Biological Data  
207 (GFBio (Diepenbroek et al., 2014)), with the standard information on sequence data provided as  
208 recommended (Yilmaz et al., 2011).

## 209 **Acknowledgements**

210 We thank the captains, crews and funding agencies of the sampling cruises AT-03 and AT-05,  
211 and the Monterey Bay Aquarium Research Institute and R. C. Vrijenhoek for providing samples.  
212 We are grateful to T. Reusch, J. Dierking, K. Trübenbach and P. Weist for the opportunity to  
213 perform host genotyping at the GEOMAR and their assistance in the laboratory. We also thank J.  
214 Wippler for scientific input, T. Enders for troubleshooting support, and A. Kupczok, L. G. E.  
215 Wilkens, and B. Geier for comments on the manuscript. This work was funded by the Max  
216 Planck Society, the MARUM German Research Foundation (DFG) Research Centre/Clusters of  
217 Excellence “The Ocean in the Earth System” and “The Ocean Floor – Earth’s Uncharted  
218 Interface” at the University of Bremen, an European Research Council Advanced Grant  
219 (BathyBiome, 340535), a Gordon and Betty Moore Foundation Marine Microbiology Initiative  
220 Investigator Award to ND (GBMF3811) and a National Science Foundation Grant (NSF OCE-  
221 1736932) to Roxanne Beinart (mentor of CB).

## 222 **Contributions**

223 MÜ, RA, LS and ND conceived the study. MÜ performed laboratory work and analyses of  
224 symbionts and hosts, prepared figures and tables, submitted data and code, and wrote the initial  
225 draft. YS, RA and LS contributed to analyses of the symbionts. CB provided samples and  
226 contributed to analyses of the host. MÜ, RA, YS and ND interpreted the results with advice from  
227 the other co-authors. MÜ, RA, YS and ND revised the final manuscript with input from all co-  
228 authors.

## 229 **Conflict of interest**

230 The authors declare they have no conflict of interest.

## 231 **Supplementary information**

232 Supplementary information is available at <https://www.biorxiv.org>.

## 233 **References**

- 234 Ansorge, R., Romano, S., Sayavedra, L., González Porras, M. Á., Kupczok, A., Tegetmeyer, H.  
235 E., Dubilier, N., & Petersen, J. M. (2019). Functional diversity enables multiple symbiont  
236 strains to coexist in deep-sea mussels. *Nature Microbiology*, *4*, 2487–2497.  
237 <https://doi.org/10.1038/s41564-019-0572-9>
- 238 Baas Becking, L. G. M. (1934). *Geobiologie of inleiding tot de milieukunde*. W.P. Van Stockum  
239 & Zoon.
- 240 Benson, A. K., Kelly, S. A., Legge, R., Ma, F., Low, S. J., Kim, J., Zhang, M., Oh, P. L.,  
241 Nehrenberg, D., Hua, K., Kachman, S. D., Moriyama, E. N., Walter, J., Peterson, D. A.,  
242 & Pomp, D. (2010). Individuality in gut microbiota composition is a complex polygenic  
243 trait shaped by multiple environmental and host genetic factors. *Proceedings of the*  
244 *National Academy of Sciences*, *107*(44), 18933–18938.  
245 <https://doi.org/10.1073/pnas.1007028107>
- 246 Breusing, C., Biastoch, A., Drews, A., Metaxas, A., Jollivet, D., Vrijenhoek, R. C., Bayer, T.,  
247 Melzner, F., Sayavedra, L., Petersen, J. M., Dubilier, N., Schilhabel, M. B., Rosenstiel,  
248 P., & Reusch, T. B. H. (2016). Biophysical and population genetic models predict the  
249 presence of “phantom” stepping stones connecting Mid-Atlantic Ridge vent ecosystems.  
250 *Current Biology*, *26*(17), 2257–2267. <https://doi.org/10.1016/j.cub.2016.06.062>
- 251 Breusing, C., Vrijenhoek, R. C., & Reusch, T. B. H. (2017). Widespread introgression in deep-  
252 sea hydrothermal vent mussels. *BMC Evolutionary Biology*, *17*, 13.  
253 <https://doi.org/10.1186/s12862-016-0862-2>
- 254 Brucker, R. M., & Bordenstein, S. R. (2013). The hologenomic basis of speciation: Gut bacteria  
255 cause hybrid lethality in the genus *Nasonia*. *Science*, *341*(6146), 667–669.  
256 <https://doi.org/10.1126/science.1240659>

- 257 Davenport, E. R. (2016). Elucidating the role of the host genome in shaping microbiome  
258 composition. *Gut Microbes*, 7(2), 178–184.  
259 <https://doi.org/10.1080/19490976.2016.1155022>
- 260 DeChaine, E. G., Bates, A. E., Shank, T. M., & Cavanaugh, C. M. (2006). Off-axis symbiosis  
261 found: Characterization and biogeography of bacterial symbionts of *Bathymodiolus*  
262 mussels from Lost City hydrothermal vents. *Environmental Microbiology*, 8(11), 1902–  
263 1912. <https://doi.org/doi:10.1111/j.1462-2920.2005.01113.x>
- 264 Di Bella, J. M., Bao, Y., Gloor, G. B., Burton, J. P., & Reid, G. (2013). High throughput  
265 sequencing methods and analysis for microbiome research. *Journal of Microbiological*  
266 *Methods*, 95(3), 401–414. <https://doi.org/10.1016/j.mimet.2013.08.011>
- 267 Dick, G. J. (2019). The microbiomes of deep-sea hydrothermal vents: Distributed globally,  
268 shaped locally. *Nature Reviews Microbiology*, 17(5), 271–283.  
269 <https://doi.org/10.1038/s41579-019-0160-2>
- 270 Diepenbroek, M., Glöckner, F. O., Grobe, P., Güntsch, A., Huber, R., König-Ries, B.,  
271 Kostadinov, I., Nieschulze, J., Seeger, B., Tolksdorf, R., & Triebel, D. (2014). Towards  
272 an integrated biodiversity and ecological research data management and archiving  
273 platform: The German federation for the curation of biological data (GFBio). In E  
274 Plödereeder, L Grunske, E Schneider, & D Ull (Eds.), *Informatik 2014* (pp. 1711–1724).  
275 Gesellschaft für Informatik e.V. <http://dl.gi.de/handle/20.500.12116/2782>
- 276 Dubilier, N., Bergin, C., & Lott, C. (2008). Symbiotic diversity in marine animals: The art of  
277 harnessing chemosynthesis. *Nature Reviews Microbiology*, 6(10), 725–740.  
278 <https://doi.org/10.1038/nrmicro1992>
- 279 Duperron, S., Bergin, C., Zielinski, F., Blazejak, A., Pernthaler, A., McKiness, Z. P., DeChaine,  
280 E., Cavanaugh, C. M., & Dubilier, N. (2006). A dual symbiosis shared by two mussel  
281 species, *Bathymodiolus azoricus* and *Bathymodiolus puteoserpentis* (Bivalvia:  
282 Mytilidae), from hydrothermal vents along the northern Mid-Atlantic Ridge.  
283 *Environmental Microbiology*, 8(8), 1441–1447. [https://doi.org/10.1111/j.1462-  
284 2920.2006.01038.x](https://doi.org/10.1111/j.1462-2920.2006.01038.x)
- 285 Ellegren, H. (2014). Genome sequencing and population genomics in non-model organisms.  
286 *Trends in Ecology & Evolution*, 29(1), 51–63. <https://doi.org/10.1016/j.tree.2013.09.008>
- 287 Faure, B., Schaeffer, S. W., & Fisher, C. R. (2015). Species Distribution and Population  
288 Connectivity of Deep-Sea Mussels at Hydrocarbon Seeps in the Gulf of Mexico. *PLOS*  
289 *ONE*, 10(4), e0118460. <https://doi.org/10.1371/journal.pone.0118460>
- 290 Grieneisen, L. E., Charpentier, M. J. E., Alberts, S. C., Blekhman, R., Bradburd, G., Tung, J., &  
291 Archie, E. A. (2019). Genes, geology and germs: Gut microbiota across a primate hybrid  
292 zone are explained by site soil properties, not host species. *Proceedings of the Royal*  
293 *Society B: Biological Sciences*, 286(1901), 20190431.  
294 <https://doi.org/10.1098/rspb.2019.0431>
- 295 Ho, P.-T., Park, E., Hong, S. G., Kim, E.-H., Kim, K., Jang, S.-J., Vrijenhoek, R. C., & Won, Y.-  
296 J. (2017). Geographical structure of endosymbiotic bacteria hosted by *Bathymodiolus*  
297 mussels at eastern Pacific hydrothermal vents. *BMC Evolutionary Biology*, 17, 121.  
298 <https://doi.org/10.1186/s12862-017-0966-3>
- 299 Ikuta, T., Takaki, Y., Nagai, Y., Shimamura, S., Tsuda, M., Kawagucci, S., Aoki, Y., Inoue, K.,  
300 Teruya, M., Satou, K., Teruya, K., Shimoji, M., Tamotsu, H., Hirano, T., Maruyama, T.,  
301 & Yoshida, T. (2016). Heterogeneous composition of key metabolic gene clusters in a

- 302 vent mussel symbiont population. *The ISME Journal*, 10(4), 990–1001.  
303 <https://doi.org/10.1038/ismej.2015.176>
- 304 Johnson, S. B., Won, Y.-J., Harvey, J. B., & Vrijenhoek, R. C. (2013). A hybrid zone between  
305 *Bathymodiolus* mussel lineages from eastern Pacific hydrothermal vents. *BMC*  
306 *Evolutionary Biology*, 13, 21. <https://doi.org/10.1186/1471-2148-13-21>
- 307 Korach-Rechtman, H., Freilich, S., Gerassy-Vainberg, S., Buhnik-Rosenblau, K., Danin-Poleg,  
308 Y., Bar, H., & Kashi, Y. (2019). Murine Genetic Background Has a Stronger Impact on  
309 the Composition of the Gut Microbiota than Maternal Inoculation or Exposure to Unlike  
310 Exogenous Microbiota. *Applied and Environmental Microbiology*, 85(18), e00826-19.  
311 <https://doi.org/10.1128/AEM.00826-19>
- 312 Li, W., Liu, J., Tan, H., Yang, C., Ren, L., Liu, Q., Wang, S., Hu, F., Xiao, J., Zhao, R., Tao, M.,  
313 Zhang, C., Qin, Q., & Liu, S. (2018). Genetic Effects on the Gut Microbiota Assemblages  
314 of Hybrid Fish From Parents With Different Feeding Habits. *Frontiers in Microbiology*,  
315 9, 2972. <https://doi.org/10.3389/fmicb.2018.02972>
- 316 Lim, S. J., & Bordenstein, S. R. (2020). An introduction to phyllosymbiosis. *Proceedings of the*  
317 *Royal Society B: Biological Sciences*, 287(1922), 20192900.  
318 <https://doi.org/10.1098/rspb.2019.2900>
- 319 Luikart, G., England, P. R., Tallmon, D., Jordan, S., & Taberlet, P. (2003). The power and  
320 promise of population genomics: From genotyping to genome typing. *Nature Reviews*  
321 *Genetics*, 4(12), 981–994. <https://doi.org/10.1038/nrg1226>
- 322 Martiny, J. B. H., Bohannan, B. J. M., Brown, J. H., Colwell, R. K., Fuhrman, J. A., Green, J. L.,  
323 Horner-Devine, M. C., Kane, M., Krumins, J. A., Kuske, C. R., Morin, P. J., Naeem, S.,  
324 Øvreås, L., Reysenbach, A.-L., Smith, V. H., & Staley, J. T. (2006). Microbial  
325 biogeography: Putting microorganisms on the map. *Nature Reviews Microbiology*, 4(2),  
326 102–112. <https://doi.org/10.1038/nrmicro1341>
- 327 O'Mullan, G. D., Maas, P. A., Lutz, R. A., & Vrijenhoek, R. C. (2001). A hybrid zone between  
328 hydrothermal vent mussels (Bivalvia: Mytilidae) from the Mid-Atlantic Ridge. *Molecular*  
329 *Ecology*, 10(12), 2819–2831. <https://doi.org/10.1046/j.0962-1083.2001.01401.x>
- 330 Picazo, D. R., Dagan, T., Ansorge, R., Petersen, J. M., Dubilier, N., & Kupczok, A. (2019).  
331 Horizontally transmitted symbiont populations in deep-sea mussels are genetically  
332 isolated. *The ISME Journal*, 13, 2954–2968. <https://doi.org/10.1038/s41396-019-0475-z>
- 333 Rennison, D. J., Rudman, S. M., & Schluter, D. (2019). Parallel changes in gut microbiome  
334 composition and function during colonization, local adaptation and ecological speciation.  
335 *Proceedings of the Royal Society B: Biological Sciences*, 286(1916), 20191911.  
336 <https://doi.org/10.1098/rspb.2019.1911>
- 337 Rothschild, D., Weissbrod, O., Barkan, E., Kurilshikov, A., Korem, T., Zeevi, D., Costea, P. I.,  
338 Godneva, A., Kalka, I. N., Bar, N., Shilo, S., Lador, D., Vila, A. V., Zmora, N., Pevsner-  
339 Fischer, M., Israeli, D., Kosower, N., Malka, G., Wolf, B. C., ... Segal, E. (2018).  
340 Environment dominates over host genetics in shaping human gut microbiota. *Nature*,  
341 555(7695), 210–215. <https://doi.org/10.1038/nature25973>
- 342 Sevellec, M., Laporte, M., Bernatchez, A., Derome, N., & Bernatchez, L. (2019). Evidence for  
343 host effect on the intestinal microbiota of whitefish (*Coregonus* sp.) species pairs and  
344 their hybrids. *Ecology and Evolution*, 9(20), 11762–11774.  
345 <https://doi.org/10.1002/ece3.5676>

- 346 Spor, A., Koren, O., & Ley, R. (2011). Unravelling the effects of the environment and host  
347 genotype on the gut microbiome. *Nature Reviews Microbiology*, 9(4), 279–290.  
348 <https://doi.org/10.1038/nrmicro2540>
- 349 Van Dover, C. L., German, C. R., Speer, K. G., Parson, L. M., & Vrijenhoek, R. C. (2002).  
350 Evolution and Biogeography of Deep-Sea Vent and Seep Invertebrates. *Science*,  
351 295(5558), 1253–1257. <https://doi.org/10.1126/science.1067361>
- 352 Van Rossum, T., Ferretti, P., Maistrenko, O. M., & Bork, P. (2020). Diversity within species:  
353 Interpreting strains in microbiomes. *Nature Reviews Microbiology*.  
354 <https://doi.org/10.1038/s41579-020-0368-1>
- 355 Wang, J., Kalyan, S., Steck, N., Turner, L. M., Harr, B., Künzel, S., Vallier, M., Häsler, R.,  
356 Franke, A., Oberg, H.-H., Ibrahim, S. M., Grassl, G. A., Kabelitz, D., & Baines, J. F.  
357 (2015). Analysis of intestinal microbiota in hybrid house mice reveals evolutionary  
358 divergence in a vertebrate hologenome. *Nature Communications*, 6(1), 1–10.  
359 <https://doi.org/10.1038/ncomms7440>
- 360 Wit, R. D., & Bouvier, T. (2006). ‘Everything is everywhere, but, the environment selects’; what  
361 did Baas Becking and Beijerinck really say? *Environmental Microbiology*, 8(4), 755–  
362 758. <https://doi.org/10.1111/j.1462-2920.2006.01017.x>
- 363 Won, Y.-J., Hallam, S. J., O’Mullan, G. D., Pan, I. L., Buck, K. R., & Vrijenhoek, R. C. (2003).  
364 Environmental acquisition of thiotrophic endosymbionts by deep-sea mussels of the  
365 genus *Bathymodiolus*. *Applied and Environmental Microbiology*, 69(11), 6785–6792.  
366 <https://doi.org/10.1128/AEM.69.11.6785-6792.2003>
- 367 Won, Y.-J., Hallam, S. J., O’Mullan, G. D., & Vrijenhoek, R. C. (2003). Cytonuclear  
368 disequilibrium in a hybrid zone involving deep-sea hydrothermal vent mussels of the  
369 genus *Bathymodiolus*. *Molecular Ecology*, 12(11), 3185–3190.  
370 <https://doi.org/10.1046/j.1365-294X.2003.01974.x>
- 371 Won, Y.-J., Young, C. R., Lutz, R. A., & Vrijenhoek, R. C. (2003). Dispersal barriers and  
372 isolation among deep-sea mussel populations (Mytilidae: *Bathymodiolus*) from eastern  
373 Pacific hydrothermal vents. *Molecular Ecology*, 12(1), 169–184.  
374 <https://doi.org/10.1046/j.1365-294X.2003.01726.x>
- 375 Yatsunenkov, T., Rey, F. E., Manary, M. J., Trehan, I., Dominguez-Bello, M. G., Contreras, M.,  
376 Magris, M., Hidalgo, G., Baldassano, R. N., Anokhin, A. P., Heath, A. C., Warner, B.,  
377 Reeder, J., Kuczynski, J., Caporaso, J. G., Lozupone, C. A., Lauber, C., Clemente, J. C.,  
378 Knights, D., ... Gordon, J. I. (2012). Human gut microbiome viewed across age and  
379 geography. *Nature*, 486(7402), 222–227. <https://doi.org/10.1038/nature11053>
- 380 Yilmaz, P., Kottmann, R., Field, D., Knight, R., Cole, J. R., Amaral-Zettler, L., Gilbert, J. A.,  
381 Karsch-Mizrachi, I., Johnston, A., Cochrane, G., Vaughan, R., Hunter, C., Park, J.,  
382 Morrison, N., Rocca-Serra, P., Sterk, P., Arumugam, M., Bailey, M., Baumgartner, L., ...  
383 Glöckner, F. O. (2011). Minimum information about a marker gene sequence  
384 (MIMARKS) and minimum information about any (x) sequence (MIxS) specifications.  
385 *Nature Biotechnology*, 29(5), 415–420. <https://doi.org/10.1038/nbt.1823>  
386
